# Supplementary material
Source: Springer Nature journal article supplement (https://www.springermedizin.de/resource/supplementary/12889_2010_2229_MOESM1_ESM.pdf/9485054)

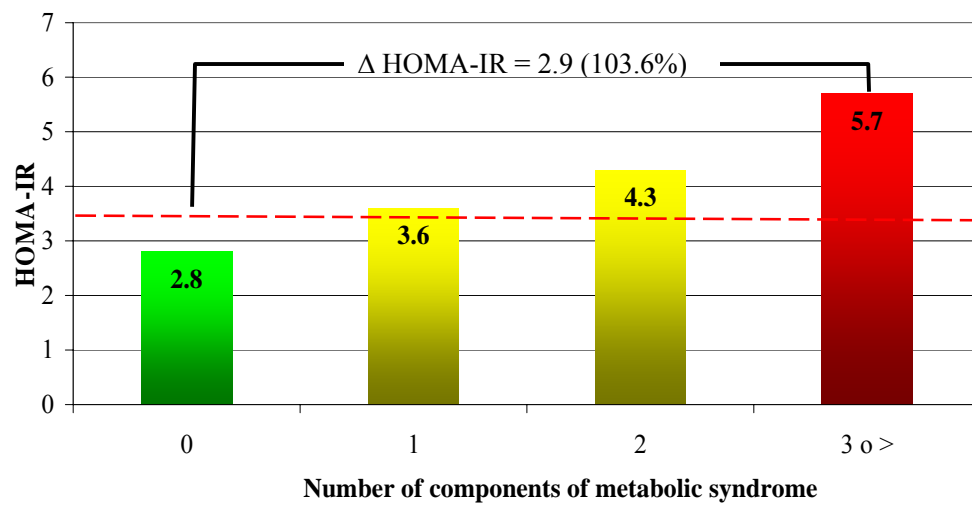

Figure 1

Supplement: MOESM1 [file 9485054]
